# Supplementary material for: The Study on Public-Interest Short Message Service (SMS) in China during the COVID-19 Pandemic: Mobile User Survey and Content Analysis
Source: MDPI journal article supplement (doi:10.3390/ijerph18157915), 2021-07-26
Supplement: s1 [file s1]

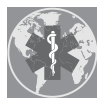

Article

# The Study on Public-Interest Short Message Service (SMS) in China during the COVID-19 Pandemic: Mobile User Survey and Content Analysis

Zhiyuan Yu <sup>1</sup> , Yanghongyun Liu <sup>1</sup>, Yongan Yu <sup>2\*</sup>, Hongju Han <sup>1</sup> and Yalin Li <sup>1</sup>

<sup>1</sup> School of Journalism and Communication, Shandong University, Jinan 250100, Shandong, China; yuzhiyuan@sdu.edu.cn (Z.Y.); liuyhy@mail.sdu.edu.cn (Y.L.); hj\_han@mail.sdu.edu.cn (H.H.); liyalin@mail.sdu.edu.cn (Y-L.L.)

<sup>2</sup> School of Physical Education, Shandong University, Jinan 250061, Shandong, China.;

\* Correspondence: yuyongan@sdu.edu.cn

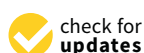

**Citation:** Yu, Z.; Liu, Y.; Yu, Y.; Han, H.; Li, Y. The Study on Public-Interest Short Message Service (SMS) in China during the COVID-19 Pandemic: Mobile User Survey and Content Analysis. *Int. J. Environ. Res. Public Health* **2021**, *18*, 7915. <https://doi.org/10.3390/ijerph18157915>

Academic Editor: William A. Toscano

Received: 12 June 2021

Accepted: 22 July 2021

Published: 26 July 2021

**Publisher's Note:** MDPI stays neutral with regard to jurisdictional claims in published maps and institutional affiliations.

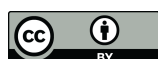

**Copyright:** © 2021 by the authors. Licensee MDPI, Basel, Switzerland. This article is an open access article distributed under the terms and conditions of the Creative Commons Attribution (CC BY) license (<https://creativecommons.org/licenses/by/4.0/>).

## 1. The related questions from Questionnaire

1) Gender:

☐ Male ☐ Female

2) Age:

☐ Under18

☐ 18-25

☐ 26-30

☐ 31-40

☐ 41-50

☐ 51-60

☐ Over 60

3) Region: \_\_\_\_\_

4) Have you received COVID-19 public-interest SMS from government/operators ? (e.g., prevention and control regulations, precaution knowledge, consumer prices, business guidance, fraud prevention tips, etc.)

☐ Yes ☐ No

5) What is your read situation about COVID-19 Public-Interest SMS?

☐ Careful-read almost each message

☐ Careful-read the selected message (based on contents, epidemic situation, etc.)

☐ Skim-read almost each message

☐ Selected browse (based on contents, epidemic situation, etc.)

☐ Rarely read

☐ Blocking

☐ Never read

6) Would you like to forward the received COVID-19 public-interest text messaging?

☐ Don't forward

☐ Selective forwarding

☐ Forward all one by one

7) Do you think the existence of COVID-19 public-interest SMS is necessary?

☐ Strongly agree

☐ Agree

☐ Neither agree nor disagree

☐ Disagree

☐ Strongly disagree

8) What is your opinion on the content of COVID-19 public-interest SMS? (multiple choice)

- ☐ Substantial content, timely reminder, helpful
- ☐ High credibility
- ☐ Homogeneous information learned from others
- ☐ Sending duplicated messages with redundant
- ☐ Useless but it doesn't matter
- ☐ No comment
- ☐ Other

9) The overall content evaluation for COVID-19 public-interest SMS.

Helpless 1 2 3 4 5 6 7 8 9 10 Helpful

10) Please evaluate the sending frequency of COVID-19 public-interest SMS.

Lower frequency 1 2 3 4 5 6 7 8 9 10 higher frequency

11) Why you didn't read COVID-19 public-interest SMS? (multiple choice)

- ☐ Do not have the habit of reading text messaging
- ☐ Not interested in the content
- ☐ Have other convenient channels to obtain information (e.g., WeChat, Weibo, etc.)
- ☐ Other

## 2. Reading & Forwarding Situation

**Table S1.** Gender \* Reading Situation Crosstabulation.

|                                                                                    |            | Male  | Female | Total  |
|------------------------------------------------------------------------------------|------------|-------|--------|--------|
| Careful-read almost each message                                                   | count      | 168   | 152    | 320    |
|                                                                                    | % of Total | 13.4% | 12.1%  | 25.5%  |
| Careful-read the selected message<br>(based on contents, epidemic situation, etc.) | count      | 173   | 249    | 422    |
|                                                                                    | % of Total | 13.8% | 19.9%  | 33.7%  |
| Skim-read almost each message                                                      | count      | 103   | 155    | 258    |
|                                                                                    | % of Total | 8.2%  | 12.4%  | 20.6%  |
| Selected browse (based on contents,<br>epidemic situation, etc.)                   | count      | 54    | 88     | 142    |
|                                                                                    | % of Total | 4.3%  | 7.0%   | 11.3%  |
| Rarely read                                                                        | count      | 27    | 52     | 79     |
|                                                                                    | % of Total | 2.2%  | 4.2%   | 6.3%   |
| Blocking                                                                           | count      | 5     | 4      | 9      |
|                                                                                    | % of Total | 0.4%  | 0.3%   | 0.7%   |
| Never read                                                                         | count      | 13    | 10     | 23     |
|                                                                                    | % of Total | 1.0%  | 0.8%   | 1.8%   |
| Total                                                                              | count      | 543   | 710    | 1253   |
|                                                                                    | % of Total | 43.3% | 56.7%  | 100.0% |

**Table S2.** Gender \* Forwarding Situation Crosstabulation

|                        |            | Male  | Female | Total  |
|------------------------|------------|-------|--------|--------|
| Don't forward          | count      | 270   | 425    | 695    |
|                        | % of Total | 22.1% | 34.8%  | 56.9%  |
| Selected forward       | count      | 239   | 266    | 505    |
|                        | % of Total | 19.6% | 21.8%  | 41.4%  |
| Forward all one by one | count      | 16    | 5      | 21     |
|                        | % of Total | 1.3%  | 0.4%   | 1.7%   |
| Total                  | count      | 525   | 696    | 1221   |
|                        | % of Total | 43.0% | 57.0%  | 100.0% |

**Table S3.** Age \* Reading Situation Crosstabulation.

|                                                                                    |            | Over 40 | 18-25 | Total  |
|------------------------------------------------------------------------------------|------------|---------|-------|--------|
| Careful-read almost each message                                                   | count      | 113     | 63    | 176    |
|                                                                                    | % of Total | 14.9%   | 8.3%  | 23.2%  |
| Careful-read the selected message<br>(based on contents, epidemic situation, etc.) | count      | 75      | 162   | 237    |
|                                                                                    | % of Total | 9.9%    | 21.4% | 31.3%  |
| Skim-read almost each message                                                      | count      | 50      | 119   | 169    |
|                                                                                    | % of Total | 6.6%    | 15.7% | 22.3%  |
| Skim-read the selected message<br>(based on contents, epidemic situation, etc.)    | count      | 34      | 63    | 97     |
|                                                                                    | % of Total | 4.5%    | 8.3%  | 12.8%  |
| Rarely read                                                                        | count      | 6       | 50    | 56     |
|                                                                                    | % of Total | 0.8%    | 6.6%  | 7.4%   |
| Blocking                                                                           | count      | 1       | 4     | 5      |
|                                                                                    | % of Total | 0.1%    | 0.5%  | 0.7%   |
| Never read                                                                         | count      | 2       | 15    | 17     |
|                                                                                    | % of Total | 0.3%    | 2.0%  | 2.2%   |
| Total                                                                              | count      | 281     | 476   | 757    |
|                                                                                    | % of Total | 37.1%   | 62.9% | 100.0% |

**Table S4.** Age \* Forwarding situation Crosstabulation.

|                        |            | Over 40 | 18-25 | Total  |
|------------------------|------------|---------|-------|--------|
| Don't forward          | count      | 118     | 334   | 452    |
|                        | % of Total | 16.1%   | 45.4% | 61.5%  |
| Selected forward       | count      | 156     | 119   | 275    |
|                        | % of Total | 21.2%   | 16.2% | 37.4%  |
| Forward all one by one | count      | 4       | 4     | 8      |
|                        | % of Total | 0.5%    | 0.5%  | 1.1%   |
| Total                  | count      | 278     | 457   | 735    |
|                        | % of Total | 37.8%   | 62.2% | 100.0% |

### 3. The trend of COVID-19 pandemic and public-interest SMS in the cities of Wuhan, Jinan, Linyi and Langfang

**Table S5.** Number of public-interest SMS and new confirmed case.

| Week              | Region         | Num. of SMS | New confirmed cases |
|-------------------|----------------|-------------|---------------------|
| 1st Jan. 24–30    | Wuhan,Hubei    | 5           | 2144                |
|                   | Jinan,Shandong | 8           | 16                  |
|                   | Langfang,Hebei | 4           | 9                   |
|                   | Linyi,Shandong | 1           | 18                  |
| 2nd Jan.31–Feb.6  | Wuhan,Hubei    | 11          | 8979                |
|                   | Jinan,Shandong | 49          | 23                  |
|                   | Langfang,Hebei | 3           | 6                   |
|                   | Linyi,Shandong | 6           | 15                  |
| 3rd Feb.7–13      | Wuhan,Hubei    | 11          | 25287               |
|                   | Jinan,Shandong | 40          | 8                   |
|                   | Langfang,Hebei | 3           | 14                  |
|                   | Linyi,Shandong | 5           | 12                  |
| 4th Feb.14–20     | Wuhan,Hubei    | 15          | 9781                |
|                   | Jinan,Shandong | 41          | 0                   |
|                   | Langfang,Hebei | 3           | 1                   |
|                   | Linyi,Shandong | 14          | 2                   |
| 5th Feb.21–27     | Wuhan,Hubei    | 9           | 2733                |
|                   | Jinan,Shandong | 32          | 0                   |
|                   | Langfang,Hebei | 7           | 0                   |
|                   | Linyi,Shandong | 9           | 0                   |
| 6th Feb.28–Mar.5  | Wuhan,Hubei    | 7           | 1660                |
|                   | Jinan,Shandong | 32          | 0                   |
|                   | Langfang,Hebei | 5           | 0                   |
|                   | Linyi,Shandong | 5           | 0                   |
| 7th Mar.6–12      | Wuhan,Hubei    | 6           | 194                 |
|                   | Jinan,Shandong | 42          | 0                   |
|                   | Langfang,Hebei | 5           | 0                   |
|                   | Linyi,Shandong | 7           | 0                   |
| 8th Mar.13–19     | Wuhan,Hubei    | 7           | 14                  |
|                   | Jinan,Shandong | 32          | 0                   |
|                   | Langfang,Hebei | 0           | 0                   |
|                   | Linyi,Shandong | 9           | 0                   |
| 9th Mar.20–26     | Wuhan,Hubei    | 8           | 1                   |
|                   | Jinan,Shandong | 23          | 0                   |
|                   | Langfang,Hebei | 4           | 0                   |
|                   | Linyi,Shandong | 0           | 0                   |
| 10th Mar.27–Apr.2 | Wuhan,Hubei    | 6           | 0                   |
|                   | Jinan,Shandong | 21          | 0                   |
|                   | Langfang,Hebei | 3           | 0                   |
|                   | Linyi,Shandong | 6           | 0                   |
| 11th Apr. 3–9     | Wuhan,Hubei    | 7           | 1                   |
|                   | Jinan,Shandong | 27          | 0                   |
|                   | Langfang,Hebei | 2           | 0                   |
|                   | Linyi,Shandong | 3           | 0                   |
| 12th Apr.10–16    | Wuhan,Hubei    | 5           | 0                   |
|                   | Jinan,Shandong | 27          | 0                   |
|                   | Langfang,Hebei | 4           | 0                   |
|                   | Linyi,Shandong | 0           | 0                   |
| 13th Apr.17–23    | Wuhan,Hubei    | 9           | 0                   |
|                   | Jinan,Shandong | 22          | 0                   |
|                   | Langfang,Hebei | 3           | 0                   |
|                   | Linyi,Shandong | 0           | 0                   |
| 14th Apr. 24–30   | Wuhan,Hubei    | 9           | 0                   |
|                   | Jinan,Shandong | 12          | 0                   |
|                   | Langfang,Hebei | 1           | 0                   |
|                   | Linyi,Shandong | 0           | 0                   |

The new confirmed data is from <http://wjw.hubei.gov.cn/bmdt/dtyw/>, <http://wsjkw.hebei.gov.cn/xgyqtb/index.jhtml>, <http://jnmhc.jinan.gov.cn/col/col50366/index.html>, <http://lycdc.linyi.cn/tzgg.htm>.
